# Supplementary material
Source: Elsevier journal article supplement (https://www.sciencedirect.com/science/article/pii/S0214916820300449)
Supplement: mmc1 [file S0214916820300449:mmc1.docx]

**Tabla suplementaria 1.** Características clínicas y metabólicas de los pacientes según el grupo de Índice de Hígado Graso (FLI)

|  | FLI <30 | FLI 30-59 | FLI ≥60 | P valor | P valor lineal |
| --- | --- | --- | --- | --- | --- |
| Individuos por grupo (%) | 101 (19,0) | 168 (31,6) | 262 (49,3) | -- | -- |
| Edad, años † | 52,67 (11,52) | 53,23 (10,18) | 52,38 (9,71) | 0,699 | 0,649 |
| Tabaquismo, n (%) | 23 (22,8) | 53 (31,5) | 95 (36,3) | 0,047 | 0,015 |
| Peso, kg † | 75,26 (7,81) | 82,30 (7,90) | 96,04 (12,79) | 0,001 | 0,001 |
| Talla, cm † | 173,21 (6,85) | 172,66 (6,43) | 173,30 (6,94) | 0,616 | 0,710 |
| IMC, kg/m2 † | 25,06 (1,90) | 27,59 (1,98) | 31,97 (3,77) | 0,001 | 0,001 |
| Perímetro abdominal, cm † | 89,56 (6,23) | 96,62 (5,64) | 107,11 (8,90) | 0,001 | 0,001 |
| Sobrepeso, n (%) | 58 (57,4) | 135 (80,4) | 74 (28,2) | 0,001 | 0,001 |
| Obesidad general, n (%) | 0 (0) | 20 (11,9) | 183 (69,8) | 0,001 | 0,001 |
| Obesidad abdominal, n (%) | 1 (1) | 27 (16,1) | 180 (68,7) | 0,001 | 0,001 |
| Grasa corporal, (% CUN-BAE#) † | 89,56 (6,22) | 28,58 (2,83) | 33,74 (4,28) | 0,001 | 0,001 |
| Presión arterial sistólica, mmHg † | 121,09 (18,85) | 126,46 (16,98) | 131,19 (18,98) | 0,001 | 0,001 |
| Presión arterial diastólica, mmHg † | 77,52 (9,05) | 80,57 (7,84) | 84,18 (10,00) | 0,001 | 0,001 |
| HTA, n ‡ | 32 (31,7) | 83 (49,4) | 155 (59,4) | 0,001 | 0,001 |
| Glucemia, mg/dL † | 100,02 (25,13) | 103,38 (29,40) | 111,60 (35,07) | 0,002 | 0,001 |
| **Insulina, μIU/mL** † | 7,50 (4,31) | 11,88 (6,03) | 17,29 (9,55) | 0,001 | 0,001 |
| **HOMA-IR, mmol x (μIU)/L2** † | 1,85 (1,25) | 3,00 (1,79) | 4,76 (3,18) | 0,001 | 0,001 |
| DM, n ‡ | 9 (8,9) | 18 (10,7) | 44 (16,9) | 0,062 | 0,024 |
| HDL colesterol (mg/dL) † | 56,83 (12,27) | 50,09 (11,64) | 45,12 (11,00) | 0,001 | 0,001 |
| LDL colesterol (mg/dL) † | 143,13 (33,21) | 148,60 (38,47) | 150,10 (38,61) | 0,285 | 0,137 |
| Colesterol total (mg/dL) † | 215,41 (35,13) | 220,14 (42,04) | 230,37 (40,19) | 0,002 | 0,001 |
| ln(TG) † | 4,29 (0,30) | 4,60 (0,35) | 5,04 (0,48) | 0,001 | 0,001 |
| HDL colesterol 40, n (%) | 7 (6,9) | 26 (15,5) | 100 (38,8) | 0,001 | 0,001 |
| LDL colesterol ≥116, n (%) | 75 (74,3) | 138 (82,1) | 212 (81,5) | 0,229 | 0,118 |
| Colesterol total ≥240, n (%) | 29 (28,7) | 52 (31) | 104 (40,3) | 0,046 | 0,018 |
| Trigliceridemia ≥150, n (%) | 2 (2) | 22 (13,1) | 123 (47,3) | 0,001 | 0,001 |
| Ácido úrico (mg/dL) † | 5,44 (1,21) | 6,13 (1,26) | 6,69 (1,36) | 0,001 | 0,001 |
| Puntos riesgo metabólico † | 3,63 (1,86) | 4,93 (1,99) | 6,55 (2,24) | 0,001 | 0,001 |

† Media (desviación estándar). # La grasa corporal fue determinada mediante la fórmula CUN-BAE. (Zubiaga, *Nutr Hosp.* 2014)

**Tabla suplementaria 2.** Características de la función renal, hepática, hematológica y vascular de los pacientes según el Índice de Hígado Graso (FLI)

|  | FLI <30 | FLI 30-59 | FLI ≥60 | P valor | P valor lineal |
| --- | --- | --- | --- | --- | --- |
| Creatinina en suero, mg/dL † | 0,99 (0,16) | 1,01 (0,14) | 1,01 (0,20) | 0,524 | 0,298 |
| Creatinuria, mg/dL † | 160,93 (66,25) | 168,43 (43) | 176,78 (65,48) | 0,115 | 0,038 |
| Albuminuria, mg/dL ‡ | 0,70 (0,42;1,00) | 0,80 (0,50;1,60) | 1,24 (0,70;2,86) | 0,001 | ---* |
| ln (cociente albúmina/creatinina en orina) † | 1,64 (0,74) | 1,87 (1,04) | 2,25 (1,22) | 0,001 | 0,001 |
| Aclaramiento Creatinina, MDRD, mL/min/1,73 m2 † | 87,73 (16,54) | 84,85 (14,29) | 86,26 (18,36) | 0,389 | 0,683 |
| Estadio ERC-1, n (%) | 3 (3) | 7 (4,2) | 30 (11,6) | 0,001 | 0,001 |
| Estadio ERC-2, n (%) | 3 (3) | 15 (9) | 27 (10,4) | 0,001 | 0,001 |
| Estadio ERC-3, n (%) | 0 (0) | 1 (0,6) | 9 (3,5) | 0,001 | 0,001 |
| Daño renal, Alb/cre >30mg/g, n (%) | 5 (4,95) | 15 (8,98) | 38 (14,56) | 0,001 | 0,001 |
| Índice neutrófilo/linfocito† | 2,08 (1,05) | 2,02 (0,78) | 1,92 (0,86) | 0,303 | 0,019 |
| VSG, mm/h ‡ | 4,00 (2,00;8,00) | 6,00 (2,00;9,00) | 7,00 (3,00;11,00) | 0,001 | ---* |
| Von Willebrand, %† | 97,20 (39,88) | 110,87 (40,78) | 118,98 (58,80) | 0,007 | 0,002 |
| Fibrinógeno, mg/dL† | 276,16 (52,94) | 290,94 (65,14) | 300,95 (55,54) | 0,019 | 0,005 |
| Fosfatasa Alcalina, UI/L† | 90,23 (25,24) | 89,64 (27,69) | 97,60 (28,69) | 0,006 | 0,005 |
| AST, UI/L ‡ | 12,00 (12,00;14,00) | 14,00 (12,00;16,00) | 15,00 (12,00;21,00) | 0,001 | ---* |
| ALT, UI/L ‡ | 14,00 (11,00;16,00) | 19,00 (14,00;24,00) | 26,00 (17,25;38,00) | 0,001 | ---* |
| GGT, UI/L ‡ | 14,00 (11,00;18,00) | 21,50(16,00;30,00) | 34,00 (24,75;53,25) | 0,001 | ---* |
| Ateromas Carótidas, n (%) | 10 (12,7) | 21 (16,9) | 26 (14,9) | 0,704 | 0,779 |
| Ateromas Femorales, n (%) | 26 (32,9) | 50 (40,3) | 79 (44,6) | 0,210 | 0,081 |
| Ateromas Periféricos#, n (%) | 28 (35,4) | 55 (43,7) | 87 (47,8) | 0,181 | 0,070 |
| REGICOR† | 3,79 (3,15) | 4,53 (2,98) | 6,10 (4,42) | 0,001 | 0,001 |

† Media (desviación estándar), ‡ Mediana (rango intercuartílico), * El análisis mediante Kruskall-Wallis no permite determinar el valor de p lineal.

Ateromas periféricos: presencia de placas de ateroma en carótidas y/o femorales.

ERC: Enfermedad renal crónica

AST: aspartato aminotransferasa.

ALT: alanina aminotransferasa.

VSG: velocidad de sedimentación globular.

**Tabla suplementaria 3.** Modelos de regresión logística que analizan la relación entre el *Fatty Liver Index* (FLI) y riesgo vascular (presencia de placas de ateroma en carótidas) ajustados por diferentes parámetros clínicos y metabólicos.

|  | Coeficiente B | Error estándar | OR | IC 95% | Valor p |
| --- | --- | --- | --- | --- | --- |
| Modelo 1 | 0,01 | 0,06 | 1,01 | 0,90-1,14 | 0,811 |
| Modelo 2 | -0,01 | 0,07 | 0,99 | 0,88-1,13 | 0,923 |
| Modelo 3 | 0,01 | 0,07 | 1,01 | 0,88-1,16 | 0,896 |
| Modelo 4 | 0,07 | 0,10 | 1,07 | 0,88-1,30 | 0,498 |
| Modelo 5 | 0,04 | 0,10 | 1,04 | 0,85-1,27 | 0,710 |
| Modelo 6 | 0,02 | 0,07 | 1,03 | 0,90-1,17 | 0,721 |
| Modelo 7 | 0,00 | 0,08 | 1,00 | 0,86-1,16 | 0,965 |

Modelo 1. Edad; Modelo 2. Edad + Función de riesgo REGICOR; Modelo 3. Edad + HOMA-IR; Modelo 4. Edad + Perímetro abdominal; Modelo 5. Edad + IMC; Modelo 6. Edad + GGT; Modelo 7. Edad + ln(TG)

**Tabla suplementaria 4.** Modelos de regresión logística que analizan la relación entre el *Fatty Liver Index* (FLI) y riesgo vascular (presencia de placas de ateroma en femorales) ajustados por diferentes parámetros clínicos y metabólicos.

|  | Coeficiente B | Error estándar | OR | IC 95% | Valor p |
| --- | --- | --- | --- | --- | --- |
| Modelo 1 | 0,10 | 0,04 | 1,11 | 1,02-1,21 | 0,015 |
| Modelo 2 | 0,05 | 0,05 | 1,05 | 0,96-1,15 | 0,314 |
| Modelo 3 | 0,09 | 0,05 | 1,09 | 0,99-1,21 | 0,074 |
| Modelo 4 | 0,28 | 0,07 | 1,32 | 1,15-1,52 | <0,001 |
| Modelo 5 | 0,23 | 0,07 | 1,26 | 1,09-1,45 | 0,002 |
| Modelo 6 | 0,06 | 0,05 | 1,06 | 0,96-1,17 | 0,238 |
| Modelo 7 | 0,00 | 0,06 | 1,00 | 0,89-1,11 | 0,941 |

Modelo 1. Edad; Modelo 2. Edad + Función de riesgo REGICOR; Modelo 3. Edad + HOMA-IR; Modelo 4. Edad + Perímetro abdominal; Modelo 5. Edad + IMC; Modelo 6. Edad + GGT; Modelo 7. Edad + ln(TG)

**Tabla suplementaria 5.** Análisis de la correlación entre el Fatty Liver Index (FLI), la gamma glutamil transferasa (GGT), el perímetro abdominal (Per. Abd.), el índice de masa corporal (IMC), los triglicéridos séricos y el índice HOMA-IR.

|  | FLI | GGT | Per. Abd. | IMC | Triglicéridos | HOMA-IR |
| --- | --- | --- | --- | --- | --- | --- |
| FLI | 1 | 0,64 | 0,81 | 0,83 | 0,67 | 0,57 |
| GGT | <0,001 | 1 | 0,25 | 0,30 | 0,45 | 0,33 |
| Per. Abd. | <0,001 | <0,001 | 1 | 0,86 | 0,30 | 0,50 |
| IMC | <0,001 | <0,001 | <0,001 | 1 | 0,31 | 0,49 |
| Triglicéridos | <0,001 | <0,001 | <0,001 | <0,001 | 1 | 0,36 |
| HOMA-IR | <0,001 | <0,001 | <0,001 | <0,001 | <0,001 | 1 |

En la parte superior de la diagonal se presenta el coeficiente de correlación de Spearman y en la parte inferior el valor de p de la asociación.
